# Supplementary material for: Steroid receptor coactivator-1 modulates the function of Pomc neurons and energy homeostasis
Source: PubMed Central journal article supplement (PMC6461669; doi:10.1038/s41467-019-08737-6), 2019-04-12
Supplement: 41467_2019_8737_MOESM1_ESM.pdf [file 41467_2019_8737_MOESM1_ESM.pdf]

1 **Steroid Receptor Coactivator-1 Modulates the Function of**

2 **Pomc Neurons and Energy Homeostasis**

3

4 Yang et al.

5

## 6 Supplementary Figure 1. SRC-1 effects in Pomc neurons.

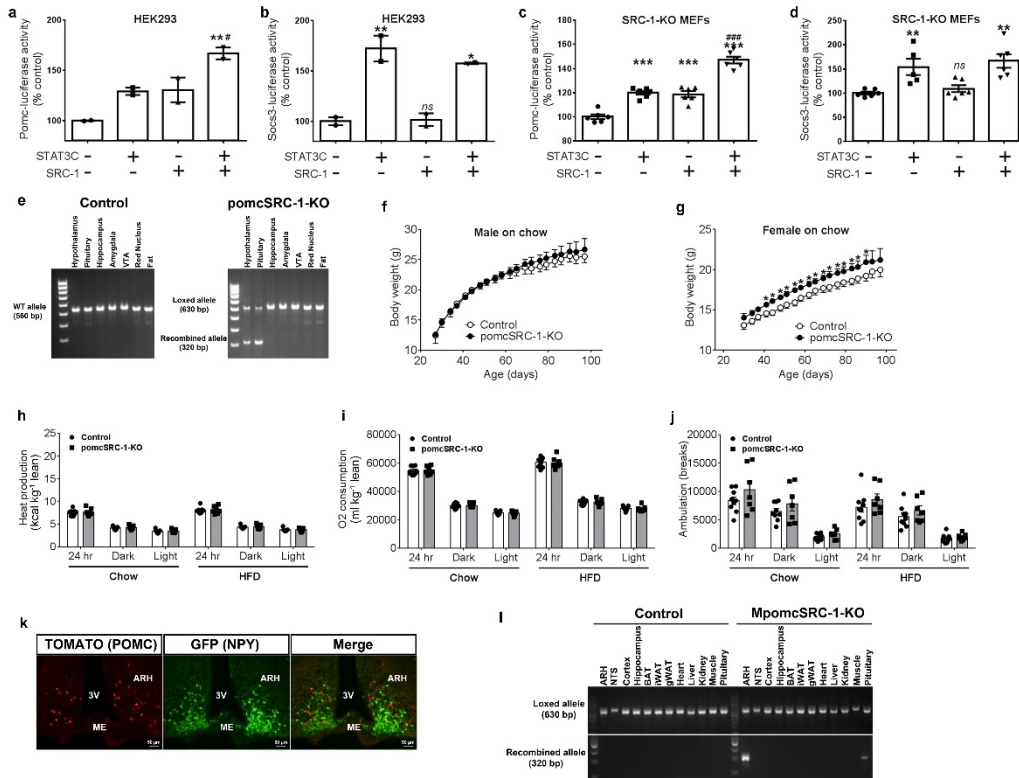

7

8 Numbers of mice/experiments are indicated; data are presented as mean  $\pm$  SEM and  
 9 compared using T-tests or two-way ANOVA followed by post hoc Sidak tests (#). (A-D) Effects  
 10 of overexpressed constitutively active STAT3 and SRC-1 on Pomc- or Socs3-luciferase activity  
 11 in HEK293 cells (a-b) and SRC-1-KO MEF cells (c-d) (n=2-6); \* P<0.05, \*\* P<0.01 and \*\*\*  
 12 P<0.001 vs. empty vectors; # P<0.05 and #### P<0.001 vs. STAT3 alone. (e) Validation of  
 13 pomcSRC-1-KO mice. PCR amplification of genomic DNA from various brain regions, pituitary  
 14 and fat. The WT SRC-1 allele (560 bp) was detected in all tissues from a control mouse. The  
 15 loxed SRC-1 allele (630 bp) was detected in all tissues from a pomcSRC-1-KO mouse, but the  
 16 recombined SRC-1 allele (320 bp) was only detected in POMC cell-containing tissues (the  
 17 hypothalamus and pituitary). VTA, ventral tegmental area. (f-g) Body weight of male (f) or  
 18 female (g) control and pomcSRC-1-KO mice fed regular chow (n=6-13). (h-j) Metabolic  
 19 phenotypes in male pomcSRC-1-KO mice. 12-week old male control and pomcSRC-1-KO mice  
 20 with matched body weight, lean mass and fat mass were adapted to the CLAMS chambers.  
 21 Mice were subjected to a 2-day-chow-2-day-HFD protocol, and chow was replaced by HFD  
 22 before the onset of dark cycle on day 3. Heat production (h), O<sub>2</sub> consumption (i) and  
 23 ambulatory movement (j) were continuously monitored and averaged for 2-day chow feeding  
 24 period and for 2-day HFD feeding period (n=7/9). (k) Distribution of TOMATO (induced by  
 25 *Pomc-CreER*) and GFP (driven by *Npy* promoter) in the ARH of *Pomc-CreER/Rosa26-tdTOMATO/Npy-GFP*  
 26 mice. No neurons were double labelled, indicating that the mature  
 27 Pomc neurons targeted by *Pomc-CreER* were segregated from mature *Npy* neurons. Scale  
 28 bar=50  $\mu$ m. 3V, 3<sup>rd</sup> ventricle; ARH, arcuate nucleus of the hypothalamus; ME, median  
 29 eminence. (l) PCR amplification of loxed allele and recombined allele in various tissues  
 30 collected from control vs. Mpomc-SRC-1-KO mice. **Source data are provided as**  
 31 **Supplementary Data 1.xlsx.**

32

33 **Supplementary Figure 2. Leptin-induced effects.**

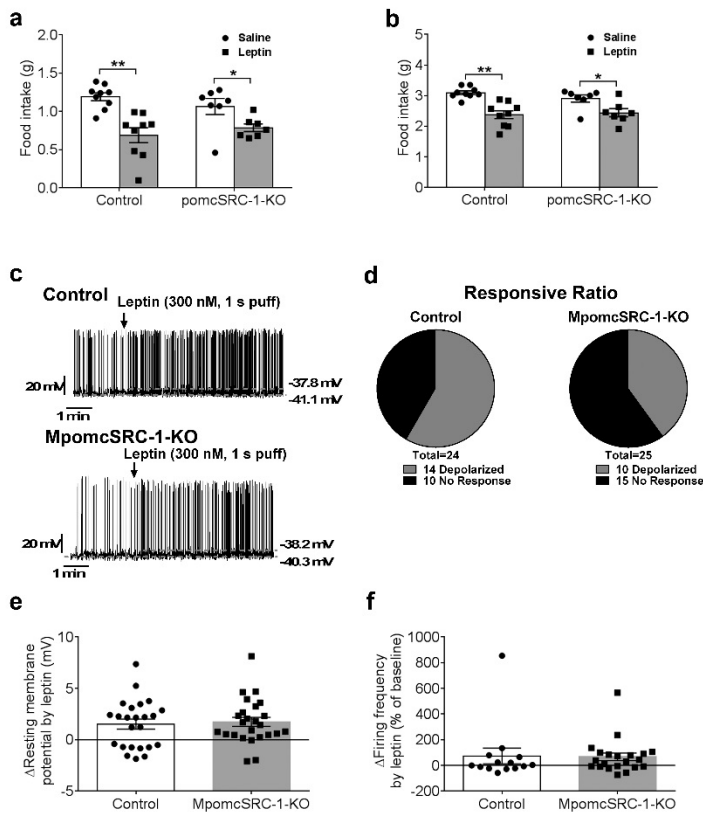

34  
 35 Numbers of mice/neurons are indicated; data are presented as mean ± SEM and compared  
 36 using T-tests or two-way ANOVA followed by post hoc Sidak tests (#). (a-b) Two-hour fasted  
 37 mice (12 weeks of age) received i.p. injections of saline/leptin (5 mg/kg) 15 min prior to  
 38 refeeding and food intake was recorded for 4 hours (a) or 24 hours (b) afterwards (n=7/9); \*  
 39 P<0.05 and \*\* P<0.01. (c) Representative traces for leptin-induced depolarization, in the  
 40 absence of synaptic blockers, in mature Pomc neurons from control mice vs. from  
 41 MpomcSRC-1-KO mice after one-week HFD feeding. (d) Responsive ratio (depolarization is  
 42 defined as >2 mV elevations in resting membrane potential, P=0.1994 in  $\chi^2$  test). (e-f)  
 43 Summary quantification of leptin-induced depolarization (e) and increases in firing frequency  
 44 (f) in two groups (n=14-25). **Source data are provided as Supplementary Data 2.xlsx.**

45

46 **Supplementary Figure 3. Mutations in SRC-1 impair SRC-1-pSTAT3 interaction.**

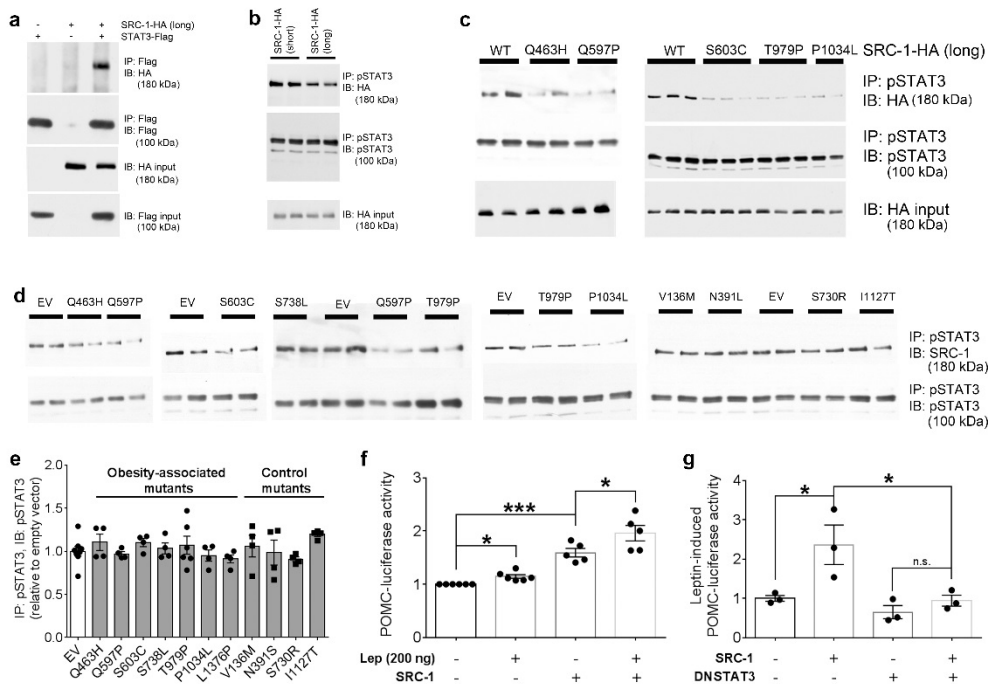

47

48 (a) HEK293 cells were transfected with STAT3-Flag alone, WT SRC-1-HA (the long isoform)  
 49 alone, or the combination of both. Interactions between the STAT3 and SRC-1 were  
 50 determined by CoIP experiments using anti-Flag and anti-HA antibodies. Representative blots  
 51 showing interactions between STAT3 and SRC-1, and inputs of HA and Flag. (b) HEK293 cells  
 52 were transfected with leptin receptor vector and STAT3 vector. Cells were treated with leptin  
 53 (200 ng/ml, 15 min) to induce phosphorylation of STAT3. pSTAT3 was purified and incubated  
 54 with long or short isoform of WT SRC-1, and interactions between the pSTAT3 and SRC-1 were  
 55 determined by CoIP experiments using anti-pSTAT3 and anti-HA antibodies. Representative  
 56 blots showing interactions between pSTAT3 and SRC-1 and inputs of SRC-1-HA (n=4). (c)  
 57 HEK293 cells were co-transfected with leptin receptor vector and human STAT3 vector. Cells  
 58 were treated with leptin (200 ng/ml, 15 min) to induce phosphorylation of STAT3. pSTAT3 was  
 59 purified and incubated with the long isoform of human SRC-1-HA (WT or obesity-associated  
 60 mutants), and interactions between the pSTAT3 and SRC-1 were determined by CoIP  
 61 experiments using anti-pSTAT3 and anti-HA antibodies. (d) HEK293 cells were cotransfected  
 62 with leptin receptor vector, STAT3 vector, and mutant SRC-1 mutant vector (or empty vector).  
 63 Cells were treated with leptin (200 ng/ml, 15 min) to induce phosphorylation of STAT3 and  
 64 interactions between the pSTAT3 and total SRC-1 were determined by CoIP experiments using  
 65 anti-pSTAT3 and anti-SRC-1 antibodies. (e) Quantification of pSTAT3 inputs (IP: pSTAT3, IB:  
 66 pSTAT3, n=4-8). (f) Neuro2A cells were co-transfected with leptin receptor vector, a POMC  
 67 luciferase expression reporter construct, and wild-type human SRC-1 (or empty vector). Cells  
 68 were stimulated with 200ng/ml leptin or vehicle for 15 minutes and then incubated for 6  
 69 hours, following which luminescence was measured (n=5/6). (g) Neuro2A cells were co-  
 70 transfected with leptin receptor vector, a POMC luciferase expression reporter construct, and  
 71 wild-type human SRC-1, a dominant negative STAT3 mutant, or their combination. Cells were  
 72 all stimulated with 200ng/ml leptin for 15 minutes and then incubated for 6 hours, following  
 73 which luminescence was measured (n=3);\* P<0.05 and \*\*\* P<0.001 in two-way ANOVA  
 74 followed by pairwise tests with a Sidak adjustment. Data were presented as mean ± SEM.  
 75 **Source data are provided as Supplementary Data 3.xlsx.**

76 **Supplementary Figure 4. Interactions between mutant SRC-1 and nuclear receptors.**

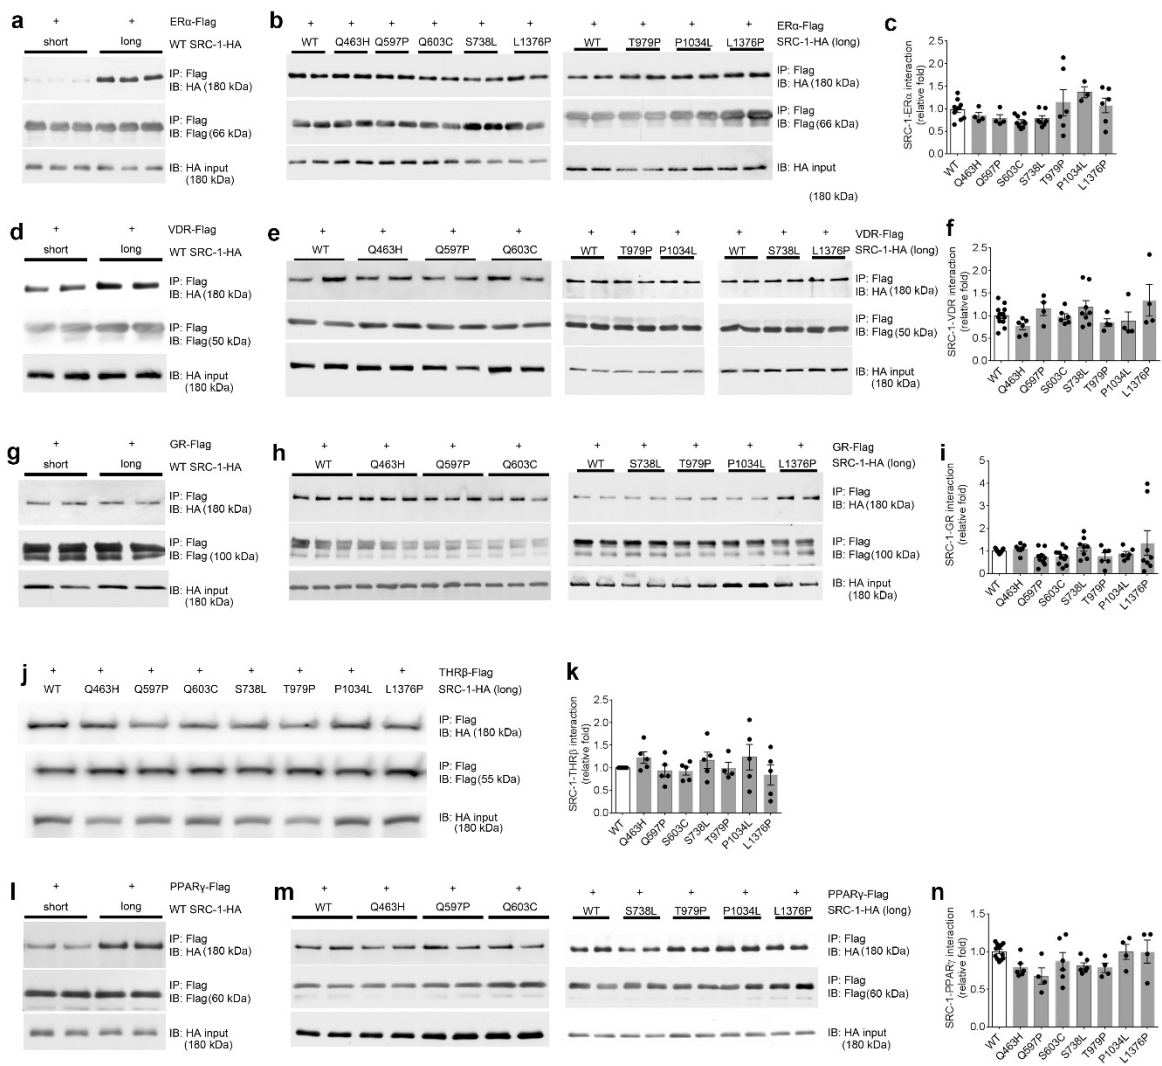

77

78 Numbers of experiments are indicated; data are presented as mean ± SEM and compared  
 79 using one-way ANOVA followed by post hoc Sidak tests. (a) HEK293 cells were transfected  
 80 with ERα-Flag and treated with 17β-estradiol (0.2 μg/ml, 30 min) to stimulate ERα. ERα was  
 81 purified and incubated with the short or long isoform WT SRC-1-HA vectors, and interactions  
 82 between the ERα and SRC-1 were determined by CoIP experiments using anti-Flag and anti-  
 83 HA antibodies. (b-c) HEK293 cells were transfected with ERα-Flag and were treated with 17β-  
 84 estradiol (0.2 μg/ml, 30 min) to stimulate ERα. ERα was purified and incubated with the SRC-  
 85 1 (long isoform WT or one of the 7 mutants), and interactions between the ERα and SRC-1  
 86 were determined by CoIP experiments using anti-Flag and anti-HA antibodies. (b)  
 87 Representative blots showing interactions between ERα and SRC-1 (WT or all 7 mutants), and  
 88 inputs of ERα and SRC-1-HA. (c) Summary quantification for WT and all 7 SRC-1 mutants.  
 89 Comparative folds were calculated as the ratios of HA blots and HA inputs (n=3-10). (d)  
 90 HEK293 cells were transfected with VDR-Flag and treated with 1,25-dihydroxyvitamin D<sub>3</sub> (0.2  
 91 μM, 30 min) to stimulate VDR. VDR was purified and incubated with the short or long isoform  
 92 WT SRC-1, and interactions between the VDR and SRC-1 were determined by CoIP  
 93 experiments using anti-Flag and anti-HA antibodies. (e-f) HEK293 cells were transfected with  
 94 VDR-Flag and treated with 1,25-dihydroxyvitamin D<sub>3</sub> (0.2 μM, 30 min) to stimulate VDR. VDR  
 95 was purified and incubated with SRC-1 (long isoform WT or one of the 7 mutants), and

96 interactions between the VDR and SRC-1 were determined by CoIP experiments using anti-  
97 Flag and anti-HA antibodies. (e) Representative blots showing interactions between VDR and  
98 SRC-1 (WT or all 7 mutants), and inputs of VDR and SRC-1-HA. (f) Summary quantification for  
99 WT and all 7 SRC-1 mutants (n=4-12). (g) HEK293 cells were transfected with GR-Flag and  
100 treated with dexamethasone (10  $\mu$ M, 30 min) to stimulate GR. GR was purified and incubated  
101 with the short or long isoform WT SRC-1, and interactions between the GR and SRC-1 were  
102 determined by CoIP experiments using anti-Flag and anti-HA antibodies. (h-i) HEK293 cells  
103 were transfected with GR-Flag and treated with dexamethasone (10  $\mu$ M, 30 min) to stimulate  
104 GR. GR was purified and incubated with SRC-1 (long isoform WT or one of the 7 mutants) and  
105 interactions between the GR and SRC-1 were determined by CoIP experiments using anti-Flag  
106 and anti-HA antibodies. (h) Representative blots showing interactions between GR and SRC-1  
107 (WT or all 7 mutants), and inputs of GR and SRC-1-HA. (i) Summary quantification for WT and  
108 all 7 SRC-1 mutants. Comparative folds were calculated as the ratios of HA blots and HA inputs  
109 (n=6-10). (j-k) Cell lysate from THR $\beta$ -Flag transfected HEK-293 cells were incubated with HA-  
110 SRC-1 cell lysate (long isoform WT or one of the 7 mutants) overnight with 1  $\mu$ M T3 thyroid  
111 hormone. Interactions between THR $\beta$  and SRC-1 were determined by CoIP experiments using  
112 anti-Flag and anti-HA antibodies. (j) Representative blots showing interactions between THR $\beta$   
113 and SRC-1 (WT or all 7 mutants), and inputs of THR $\beta$  and SRC-1-HA. (k) Summary  
114 quantification for WT and all 7 SRC-1 mutants. Comparative folds were calculated as the ratios  
115 of HA blots and HA inputs (n=4/5). (l) HEK293 cells were transfected with PPAR $\gamma$ -Flag and  
116 treated with rosiglitazone (50  $\mu$ M, 30 min) to stimulate PPAR $\gamma$ . PPAR $\gamma$  was purified and  
117 incubated with the short or long isoforms of WT SRC-1, and interactions between the PPAR $\gamma$   
118 and SRC-1 were determined by CoIP experiments using anti-Flag and anti-HA antibodies. (m-  
119 n) HEK293 cells were transfected with PPAR $\gamma$ -Flag and treated with rosiglitazone (50  $\mu$ M, 30  
120 min) to stimulate PPAR $\gamma$ . PPAR $\gamma$  was purified and incubated with the long isoform of SRC-1  
121 (WT or one of 7 mutants), and interactions between the PPAR $\gamma$  and SRC-1 were determined  
122 by CoIP experiments using anti-Flag and anti-HA antibodies. (m) Representative blots showing  
123 interactions between PPAR $\gamma$  and SRC-1 (WT or all 7 mutants), and inputs of PPAR $\gamma$  and SRC-  
124 1-HA. (n) Summary quantification for WT and all 7 SRC-1 mutants (n=4-12). **Source data are**  
125 **provided as Supplementary Data 4.xlsx.**

126 **Supplementary Table 1. Primer sequences.**

| <b>Gene/Protein</b> | <b>Species</b> | <b>Primer Sequence</b>     | <b>Primer Names</b> | <b>Accession#</b> |
|---------------------|----------------|----------------------------|---------------------|-------------------|
| Cyclophilin         | mouse          | 5`tgagagacaccaagacagaca    | CYCLO-QF            | M60456            |
|                     |                | 5`tgccggagtcgacaatgat      | CYCLO-QR            |                   |
| POMC                | mouse          | 5'gagccactgaacatctttgtc    | mPOMC-QF            | NM_008895         |
|                     |                | 5'gcagaggcaacaagattgg      | mPOMC-QR            |                   |
| SOCS3               | mouse          | 5'cacctggactcctatgagaaagtg | mSOCS3-QF           | NM_007707         |
|                     |                | 5'gagcatcactgatccaggaact   | mSOCS3-QR           |                   |
| POMC-promoter       | mouse          | 5'gttgggagcttggtgtgtt      | POMC-F1             |                   |
| Site 1              |                | 5'ggtgcctgcctaactacca      | POMC-R1             |                   |
| POMC-promoter       | mouse          | 5'ttccatcattggggaatc       | POMC-F2             |                   |
| Site 2              |                | 5'tcttgagatcggagtggaa      | POMC-R2             |                   |
| POMC-promoter       | mouse          | 5'gagacagaggcccagacatctt   | POMC-F3             |                   |
| Site 3              |                | 5'ccgagaatgaaagttgtggtgaa  | POMC-R3             |                   |

127

128

## KEY RESOURCES TABLE

| REAGENT or RESOURCE                                  | SOURCE                                       | IDENTIFIER  |
|------------------------------------------------------|----------------------------------------------|-------------|
| <b>Antibodies</b>                                    |                                              |             |
| rabbit anti-pSTAT3 antibody                          | Cell Signaling                               | 9145s       |
| biotinylated anti-rabbit secondary antibody          | Vector Labs                                  | BA-1000     |
| rabbit monoclonal SRC-1 (128E7) antibody             | Cell Signaling                               | 2191s       |
| monoclonal anti- $\beta$ -Actin antibody (AC-15)     | Sigma                                        | A5441       |
| Peroxidase-AffiniPure Goat Anti-Mouse IgG (H+L)      | Jackson ImmunoResearch                       | 115-035-166 |
| Peroxidase-AffiniPure Goat Anti-Rabbit IgG (H+L)     | Jackson ImmunoResearch                       | 111-035-144 |
| Stat3 Antibody (C-20)STAT3                           | Santa Cruz                                   | sc-482      |
| Monoclonal ANTI-FLAG <sup>®</sup> M2 antibody        | Sigma                                        | F3165       |
| <b>Chemicals, Peptides, and Recombinant Proteins</b> |                                              |             |
| tamoxifen                                            | sigma                                        | T-5648      |
| leptin                                               | HARBOR-UCLA Research And Education Institute | N/A         |
| 17 $\beta$ -estradiol                                | Sigma                                        |             |
| Vitamin D3 (Calcitriol)                              | TOCRIS                                       | 2551        |
| dexamethasone                                        | Sigma                                        | D4902       |
| rosiglitazone                                        | ADIPOGEN                                     | AG-CR1-3570 |
| <b>Experimental Models: Cell Lines</b>               |                                              |             |
| SRC-1 KO MEF                                         | This paper                                   | N/A         |
| <b>Experimental Models: Organisms/Strains</b>        |                                              |             |
| Mouse: Pomc-Cre                                      | Jackson Laboratory                           | 005965      |
| Mouse: Pomc-CreER                                    | Berglund, et al. 2013                        | N/A         |
| Mouse: SRC-1 <sup>lox/lox</sup>                      | Yamada et al., 2004                          | N/A         |
| Mouse: Rosa26-tdTOMATO                               | Jackson Laboratory                           | 007909      |
| Mouse: NPY-GFP                                       | Jackson Laboratory                           | 006417      |
| Mouse: SRC-1 <sup>L1376P/+</sup>                     | This paper                                   | N/A         |
| Mouse: SRC-1-KO                                      | Xu et al., 1998                              | N/A         |
| <b>Recombinant DNA</b>                               |                                              |             |
| Psg5 SRC-1                                           | Louet, et al., 2010                          | N/A         |
| pRc/CMV-STAT3; STAT3C-Flag                           | Horvath, et al., 1995                        | N/A         |
| pcDNA3.1-LepR                                        | This paper                                   | N/A         |
| pGL3-SOCS3-Luc 6T1                                   | Auernhammer et al., 1999                     | N/A         |
| pGL3-rPOMC-Luc                                       | Zhang, et al., 2011                          | N/A         |
| pGL3-hPomc-Luc                                       | This paper                                   | N/A         |
| pcDNA3.1-hSRC-1-HA                                   | This paper                                   | N/A         |
| pcDNA3.1-hSRC-1-Myc                                  | This paper                                   | N/A         |
| pcDNA3.1-hER $\alpha$ -Flag                          | This paper                                   | N/A         |
| pcDNA3.1-hPPAR $\gamma$ -Flag                        | This paper                                   | N/A         |
| pcDNA3.1-hGR-Flag                                    | This paper                                   | N/A         |
| pcDNA3.1-hGR-Flag                                    | This paper                                   | N/A         |
| pRL-SV40                                             | Promega                                      | E2231       |
