# Supplementary material for: Steroid receptor coactivator-1 modulates the function of Pomc neurons and energy homeostasis
Source: PubMed Central journal article supplement (PMC6461669; doi:10.1038/s41467-019-08737-6), 2019-04-12
Supplement: 41467_2019_8737_MOESM3_ESM.pdf [file 41467_2019_8737_MOESM3_ESM.pdf]

## Description of Additional Supplementary Files

**File Name:** Supplementary Data 1

**Description:** Source Data file for Supplementary Figure 1

**File Name:** Supplementary Data 2

**Description:** Source Data file for Supplementary Figure 2

**File Name:** Supplementary Data 3

**Description:** Source Data file for Supplementary Figure 3

**File Name:** Supplementary Data 4

**Description:** Source Data file for Supplementary Figure 4
